# Supplementary material
Source: PubMed Central journal article supplement (PMC3069187)
Supplement: 1015286108_pnas.201015286SI.pdf [file 1015286108_pnas.201015286SI.pdf]

# Supporting Information

Houston et al. 10.1073/pnas.1015286108

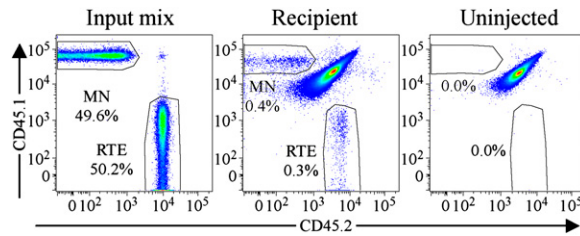

**Fig. S1.** Gating scheme for detection of transferred congenically marked cells. Sorted naïve ( $CD44^{lo/mid} CD62L^{hi}$ )  $GFP^+$  recent thymic emigrants (RTEs) and  $GFP^-$  mature naïve (MN) T cells were mixed at an  $\sim 1:1$  ratio (*Left*) and injected into lymphoreplete hosts ( $1-1.5 \times 10^6$  of each population per recipient). At analysis time points, donor and host cell populations were resolved using congenic markers (*Center*), with cells from uninjected mice serving as gating controls (*Right*).

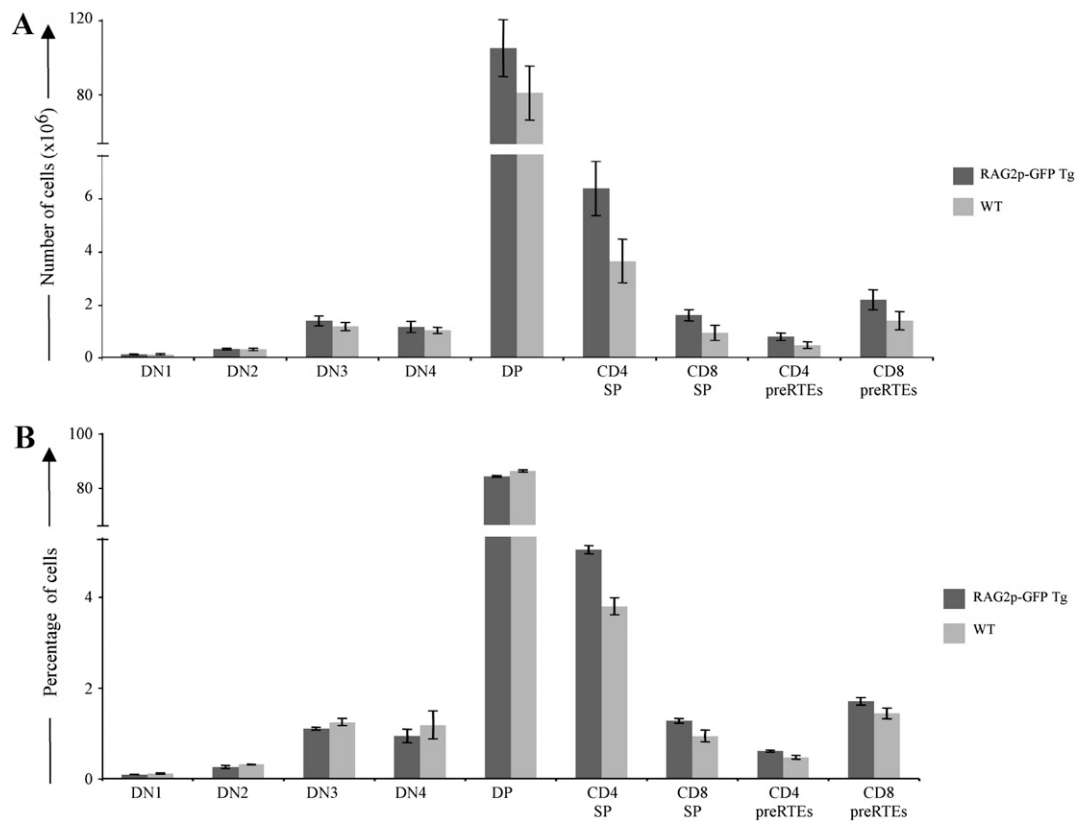

**Fig. S2.** Thymocyte populations are normal in percent and number in mice transgenic for GFP under control of the recombination activating gene 2 promoter (RAG2p-GFP Tg mice). Thymocytes from four RAG2p-GFP Tg and three non-Tg age- and sex-matched mice were surface stained for CD4, CD8, CD25, CD44, TCR $\beta$ , and CD69 to identify double-negative, double-positive, and CD4 and CD8 single-positive  $GFP^+$  T-cell receptor  $\beta$ -positive (TCR $\beta^+$ ) thymocyte populations. preRTEs were the most mature CD69<sup>lo</sup> subset of CD4 and CD8 single-positive  $GFP^+$  TCR $\beta^+$  thymocytes. (A) Total cell numbers in each thymocyte population. (B) Percentages of total thymocytes.

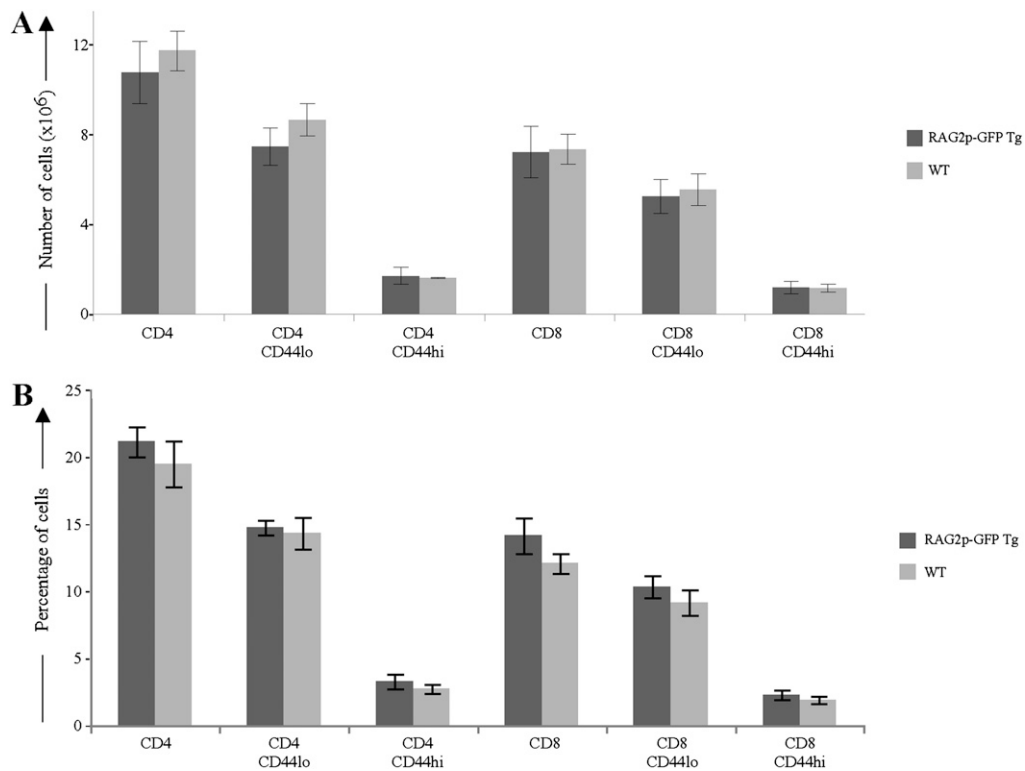

**Fig. S3.** Naïve and activated CD4 and CD8 T-cell populations are normal in percent and number in RAG2p-GFP Tg mice. Splenocytes from four RAG2p-GFP Tg and three non-Tg age- and sex-matched mice were surface stained for CD4, CD8, and CD44. (A) Total cell numbers in each splenocyte population. (B) Percentages of total splenocytes.

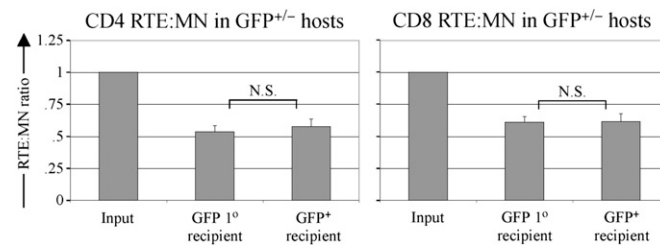

**Fig. S4.** GFP does not serve as a transplantation antigen in the RAG2p-GFP Tg system. Naïve CD4 (Left) or CD8 (Right) RTEs and MN T cells were coinjecting into lymphoreplete RAG2p-GFP Tg (GFP<sup>+</sup>) or GFP<sup>-</sup> WT mice primed with GFP<sup>+</sup> splenocytes (GFP 1<sup>o</sup>), and the splenic RTE:MN ratio relative to input was calculated 3 wk posttransfer.  $n = 3$  mice per group; data are representative of three independent experiments. Error bars represent SEM. Differences were not statistically significant (N.S) ( $P = 0.64$  and  $P = 0.91$  for CD4 and CD8 RTE:MN, respectively, using an unpaired Student's  $t$  test).
